# Supplementary material
Source: Springer Nature journal article supplement (https://www.springermedizin.de/resource/supplementary/12885_2012_3885_MOESM4_ESM.pdf/9464692)

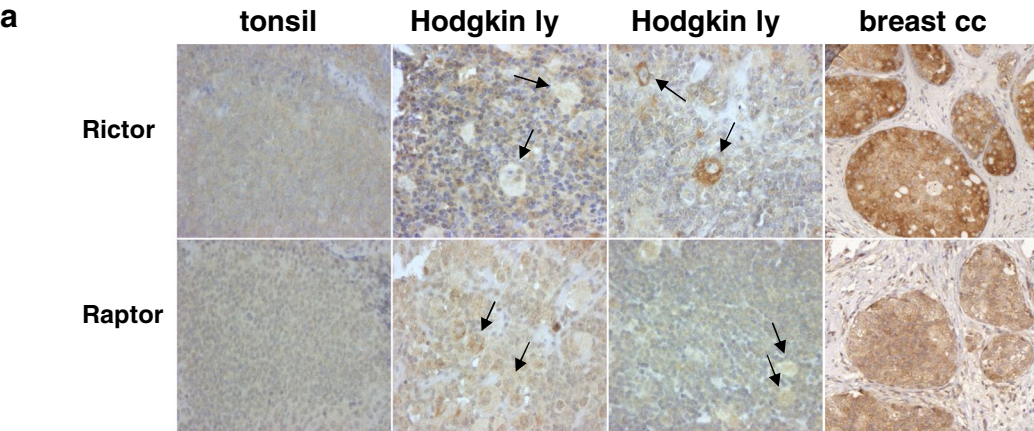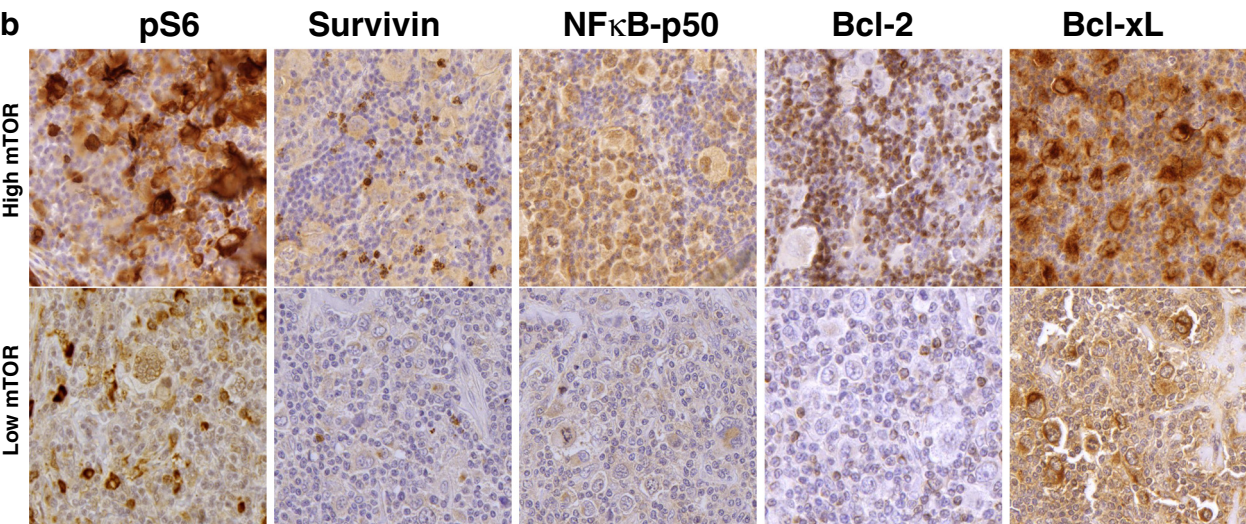

Supplement: MOESM4 [file 9464692]
